# Supplementary material for: Estimation of Genetic Parameters for Conformation Traits and Milk Production Traits in Chinese Holsteins
Source: MDPI journal article supplement (doi:10.3390/ani13010100), 2022-12-27
Supplement: s1 [file s1]

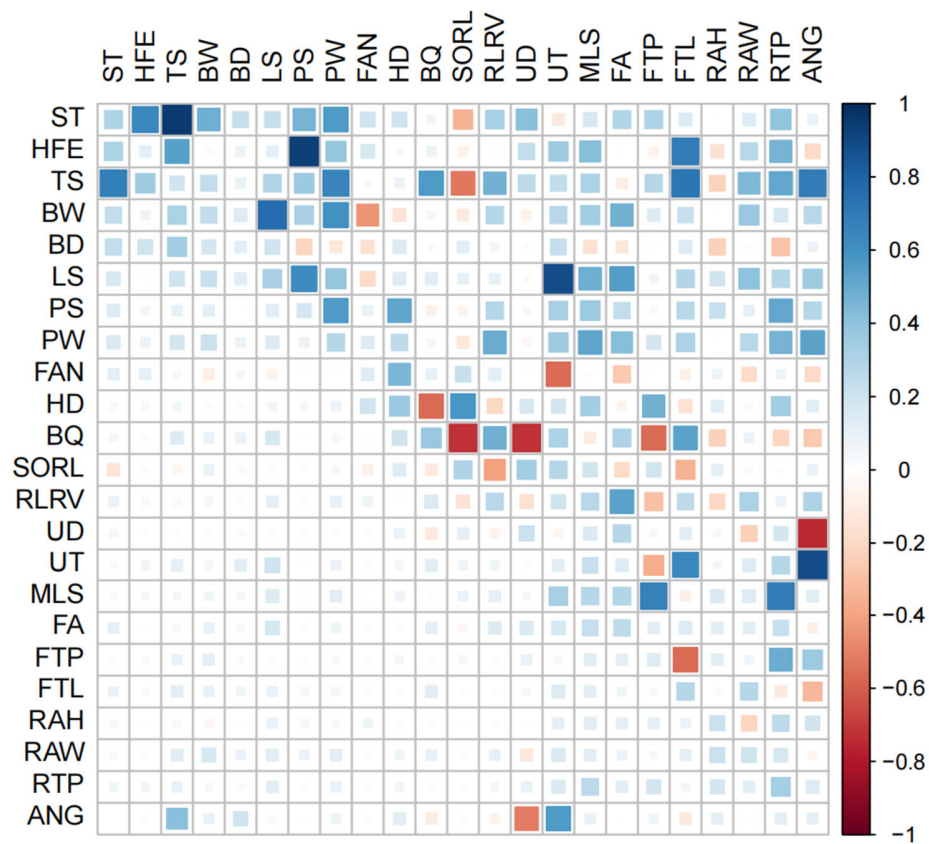

**Figure S1.** Genetic and phenotypic correlations among conformation traits. ST, stature; HFE, height at the front end; TS, trunk size; BW, chest width; BD, body depth; LS, loin strength; PS, pin setting; PW, pin width; FAN, foot angle; HD, heel depth; BQ, bone quality; SORL, set of rear legs; RLRV, rear leg-rear view; UD, udder depth; UT, udder texture; MSL, median suspensory; FA, fore attachment; FTP, fore teat placement; FTL, fore teat length; RAH, rear attachment height; RAW, rear attachment width; RTP, rear teat placement; ANG, angularity. Blue represents a positive correlation and red represents a negative correlation.
