# Supplementary material for: Estimation of Genetic Parameters for Conformation Traits and Milk Production Traits in Chinese Holsteins
Source: MDPI journal article supplement (doi:10.3390/ani13010100), 2022-12-27
Supplement: s1 [file s1]

**Table S1.** Genetic and phenotypic correlations between conformation traits<sup>1</sup> in Chinese Holsteins.

| Traits <sup>2</sup> | ST          | HFE   | TS          | CW    | BD    | LS          | PS          | PW          | FAN   | HD    | BQ          | SORL        | RLRV  | UD    | UT          | MSL         | FA          | FTP         | FTL         | RAH   | RAW   | RTP         | ANG         |
|---------------------|-------------|-------|-------------|-------|-------|-------------|-------------|-------------|-------|-------|-------------|-------------|-------|-------|-------------|-------------|-------------|-------------|-------------|-------|-------|-------------|-------------|
| ST                  |             | 0.64  | <b>0.95</b> | 0.48  | 0.23  | 0.23        | 0.46        | 0.57        | 0.20  | 0.20  | 0.06        | -0.35       | 0.32  | 0.41  | -0.12       | 0.17        | 0.29        | 0.30        | 0.15        | -0.01 | 0.14  | 0.39        | 0.09        |
| HFE                 | 0.31        |       | <b>0.54</b> | -0.03 | 0.08  | 0.11        | <b>0.93</b> | 0.38        | 0.17  | -0.04 | 0.08        | -0.08       | 0.01  | 0.24  | 0.35        | 0.42        | 0.01        | -0.07       | <b>0.69</b> | -0.16 | 0.27  | 0.46        | -0.20       |
| TS                  | <b>0.68</b> | 0.35  |             | 0.24  | 0.09  | 0.29        | 0.36        | <b>0.65</b> | -0.04 | 0.08  | <b>0.56</b> | -0.53       | 0.47  | 0.26  | 0.24        | 0.31        | -0.10       | 0.28        | <b>0.72</b> | -0.23 | 0.44  | <b>0.51</b> | <b>0.69</b> |
| CW                  | 0.24        | 0.07  | 0.31        |       | 0.15  | <b>0.76</b> | 0.32        | <b>0.60</b> | -0.45 | -0.15 | 0.05        | -0.12       | 0.28  | -0.08 | 0.27        | 0.34        | 0.47        | 0.14        | 0.22        | -0.01 | 0.37  | 0.17        | 0.27        |
| BD                  | 0.24        | 0.20  | 0.34        | 0.18  |       | 0.20        | -0.22       | -0.13       | -0.16 | 0.16  | 0.03        | 0.12        | 0.05  | 0.02  | 0.23        | -0.16       | -0.13       | -0.02       | 0.15        | -0.24 | 0.01  | -0.29       | 0.08        |
| LS                  | 0.17        | 0.01  | 0.20        | 0.22  | 0.13  |             | <b>0.62</b> | 0.38        | -0.20 | 0.14  | 0.13        | 0.10        | 0.10  | 0.03  | <b>0.88</b> | 0.48        | <b>0.55</b> | 0.06        | 0.29        | 0.19  | 0.40  | 0.28        | 0.35        |
| PS                  | 0.14        | 0.05  | 0.10        | 0.11  | -0.01 | 0.13        |             | <b>0.56</b> | 0.09  | 0.52  | -0.08       | -0.07       | 0.28  | 0.04  | 0.32        | 0.36        | 0.24        | 0.03        | 0.27        | 0.22  | 0.10  | 0.51        | 0.28        |
| PW                  | 0.16        | 0.08  | 0.18        | 0.21  | 0.08  | 0.15        | 0.08        |             | 0.14  | 0.25  | 0.05        | -0.13       | 0.49  | -0.05 | 0.35        | <b>0.52</b> | 0.42        | 0.18        | 0.31        | -0.01 | 0.27  | 0.46        | <b>0.53</b> |
| FAN                 | 0.11        | 0.11  | 0.04        | -0.10 | 0.05  | -0.07       | -0.01       | -0.01       |       | 0.45  | 0.10        | 0.22        | 0.13  | 0.01  | -0.57       | 0.01        | -0.27       | -0.01       | -0.09       | 0.07  | -0.19 | 0.07        | -0.20       |
| HD                  | 0.04        | 0.04  | 0.06        | 0.02  | 0.02  | 0.06        | 0.04        | 0.08        | 0.20  |       | -0.56       | <b>0.58</b> | -0.21 | 0.17  | 0.18        | 0.34        | -0.07       | 0.47        | -0.16       | 0.13  | 0.03  | 0.34        | 0.12        |
| BQ                  | 0.05        | -0.03 | 0.14        | 0.09  | 0.08  | 0.17        | 0.01        | 0.04        | -0.02 | 0.20  |             | -0.73       | 0.48  | -0.73 | 0.31        | -0.11       | 0.30        | -0.56       | 0.53        | -0.24 | 0.08  | -0.22       | -0.27       |
| SORL                | -0.14       | 0.02  | -0.06       | 0.09  | -0.04 | 0.02        | 0.01        | 0.04        | -0.09 | 0.14  | -0.12       |             | -0.41 | 0.34  | 0.28        | 0.19        | -0.19       | 0.19        | -0.34       | 0.11  | -0.03 | -0.02       | 0.09        |
| RLRV                | 0.08        | 0.04  | 0.04        | 0.05  | 0.02  | 0.11        | -0.02       | 0.10        | 0.07  | 0.01  | 0.16        | -0.16       |       | -0.17 | 0.19        | 0.27        | 0.53        | -0.30       | 0.25        | -0.21 | 0.31  | 0.08        | 0.30        |
| UD                  | 0.05        | 0.01  | 0.01        | 0.02  | 0.03  | 0.02        | 0.02        | -0.02       | -0.02 | 0.09  | -0.12       | 0.11        | -0.07 |       | -0.06       | 0.16        | 0.28        | 0.04        | 0.12        | 0.04  | -0.24 | 0.18        | -0.75       |
| UT                  | 0.03        | 0.06  | 0.11        | 0.05  | 0.12  | 0.20        | -0.01       | 0.08        | -0.03 | 0.05  | 0.13        | 0.07        | 0.06  | 0.02  |             | 0.22        | 0.14        | -0.37       | <b>0.64</b> | 0.05  | 0.15  | 0.28        | <b>0.88</b> |
| MSL                 | 0.03        | 0.05  | 0.05        | 0.06  | 0.05  | 0.15        | -0.01       | 0.12        | -0.01 | 0.07  | 0.01        | 0.08        | 0.11  | 0.05  | 0.32        |             | 0.29        | <b>0.67</b> | -0.09       | 0.16  | 0.15  | <b>0.69</b> | 0.13        |
| FA                  | 0.10        | 0.01  | 0.04        | 0.09  | 0.04  | 0.17        | -0.03       | 0.07        | 0.01  | 0.02  | 0.11        | -0.05       | 0.14  | 0.16  | 0.17        | 0.23        |             | 0.12        | 0.15        | 0.12  | 0.12  | 0.22        | -0.09       |
| FTP                 | 0.02        | 0.03  | 0.09        | 0.11  | 0.03  | 0.02        | 0.01        | 0.04        | 0.00  | 0.05  | -0.02       | 0.05        | -0.03 | 0.09  | 0.04        | 0.13        | 0.11        |             | -0.57       | 0.12  | 0.06  | 0.49        | 0.36        |
| FTL                 | 0.08        | 0.03  | 0.12        | 0.09  | 0.06  | 0.09        | 0.05        | 0.05        | -0.03 | 0.02  | 0.13        | 0.00        | 0.01  | 0.04  | 0.15        | 0.12        | 0.06        | 0.04        |             | -0.03 | 0.28  | -0.12       | -0.33       |
| RAH                 | 0.04        | 0.01  | -0.04       | -0.05 | 0.01  | 0.09        | 0.05        | 0.04        | 0.07  | 0.02  | -0.03       | -0.01       | -0.02 | 0.01  | 0.11        | 0.13        | 0.11        | 0.11        | 0.08        |       | -0.22 | 0.25        | 0.19        |
| RAW                 | 0.04        | 0.02  | 0.13        | 0.17  | 0.08  | 0.13        | 0.08        | 0.12        | -0.02 | 0.07  | 0.10        | 0.02        | 0.10  | -0.13 | 0.16        | 0.12        | 0.08        | 0.04        | 0.11        | 0.21  |       | 0.17        | -0.06       |
| RTP                 | 0.06        | 0.06  | 0.09        | 0.04  | 0.03  | 0.12        | 0.02        | 0.09        | 0.03  | 0.06  | 0.02        | 0.02        | 0.05  | 0.09  | 0.16        | 0.26        | 0.12        | 0.18        | 0.05        | 0.18  | 0.12  |             | 0.15        |
| ANG                 | 0.00        | -0.03 | <b>0.41</b> | 0.09  | 0.19  | 0.03        | -0.01       | 0.07        | 0.02  | 0.13  | -0.11       | -0.03       | -0.07 | -0.52 | <b>0.56</b> | 0.09        | -0.01       | 0.07        | -0.12       | 0.11  | -0.01 | 0.11        |             |

<sup>1</sup> The genetic correlation (above diagonal), heritability (diagonal), and phenotypic correlation (below diagonal).

<sup>2</sup> ST, stature; HFE, height at the front end; TS, trunk size; CW, chest width; BD, body depth; LS, loin strength; PS, pin setting; PW, pin width; FAN, foot angle; HD, heel depth; BQ, bone quality; SORL, set of rear legs; RLRV, rear leg-rear view; UD, udder depth; UT, udder texture; MSL, median suspensory; FA, fore attachment; FTP, fore teat placement; FTL, fore teat length; RAH, rear attachment height; RAW, rear attachment width; RTP, rear teat placement; ANG, angularity.
